# Supplementary material
Source: PubMed Central journal article supplement (PMC6648172)
Supplement: Supp_Table1.pdf [file Supp_Table1.pdf]

## Supplementary Data

SUPPLEMENTARY TABLE S1. PRIMERS USED FOR REAL-TIME POLYMERASE CHAIN REACTION

| <i>Gene</i>   | <i>Forward</i>         | <i>Reverse</i>          |
|---------------|------------------------|-------------------------|
| <i>AQP1</i>   | TAACCCTGCTCGGTCTTTG    | AGTCGTAGATGAGTACAGCCAG  |
| <i>ATP1A3</i> | AAGGAGGTGGCTATGACAGAG  | GTGAGTGCCTTAGGCCCAT     |
| <i>LRP2</i>   | GGCCTGCTATAACACCAGTCA  | ACTCATTGTGCAAGCATATCTCA |
| <i>GGT1</i>   | CTGGGGAGATCCGAGGCTAT   | GATGACGGTCCGCTTGTTTTT   |
| <i>SLC9A3</i> | GGCCAAGATCGGGTTCCAC    | CCCAGGTTGCCGAAGAAGA     |
| <i>GAPDH</i>  | AATCCCATCACCATCTTCCA   | TGGACTCCACGACGTACTCA    |
| <i>Tgfb1</i>  | TGGCGATACCTCAGCAACC    | CTCGTGGATCCACTTCCAG     |
| <i>Tgfb2</i>  | ATCCCGCCCACTTTCTACAGAC | CATCCAAAGCACGCTTCTTCCG  |
| <i>Tgfb3</i>  | TACTATGCCAACTTCTGCTCAG | AACTTACCATCCCTTTCCTC    |
| <i>Tgibr1</i> | ACGGCGTTACAGTGTTCTG    | GGTGTGGCAGATATAGACC     |
| <i>Tgibr2</i> | AGCAACTGCAGCATCACCTC   | TGATGTCTGAGAAGATGTCC    |
